# Supplementary material for: Construction of hierarchical In2O3/In2S3-ZnCdS ternary microsphere heterostructures for efficient photocatalytic nitrogen fixation
Source: Royal Society of Chemistry journal article supplement (doi:10.1039/d4dt01605j), 2024-01-01
Supplement: d4dt01605j1.pdf [file d4dt01605j1.pdf]

## Supporting Information

### Construction of hierarchical $\text{In}_2\text{O}_3/\text{In}_2\text{S}_3$ -ZnCdS ternary microsphere heterostructures for efficient photocatalytic nitrogen fixation

Liangliang Huang, Tao Peng, Rui Wang, Beibei He, Jun Jin, Huanwen Wang, Yansheng Gong \*

Faculty of Materials Science and Chemistry, China University of Geosciences, Wuhan 430074, P.  
R. China

\*Corresponding author:

Tel./Fax: +86 027 6788 3731;

E-mail addresses: gongysh@cug.edu.cn (Y. Gong);

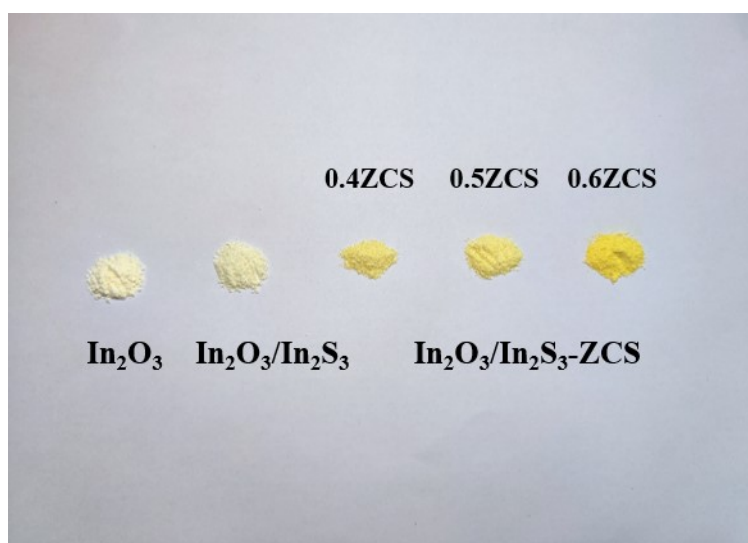

Fig.S1 All samples of the actual picture

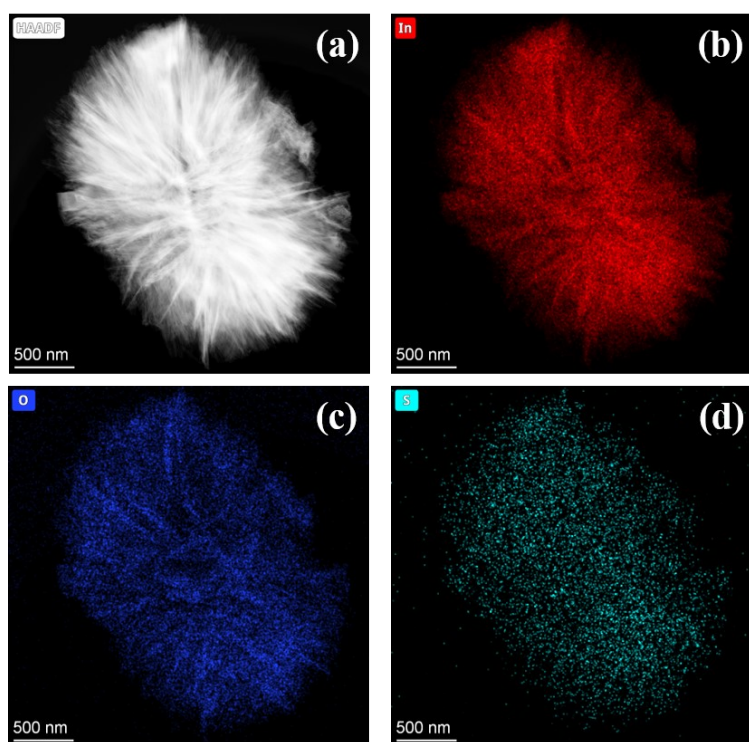

**Fig. S2** (a-d) Elemental mapping images of In, O, S of the  $\text{In}_2\text{O}_3/\text{In}_2\text{S}_3$  sample

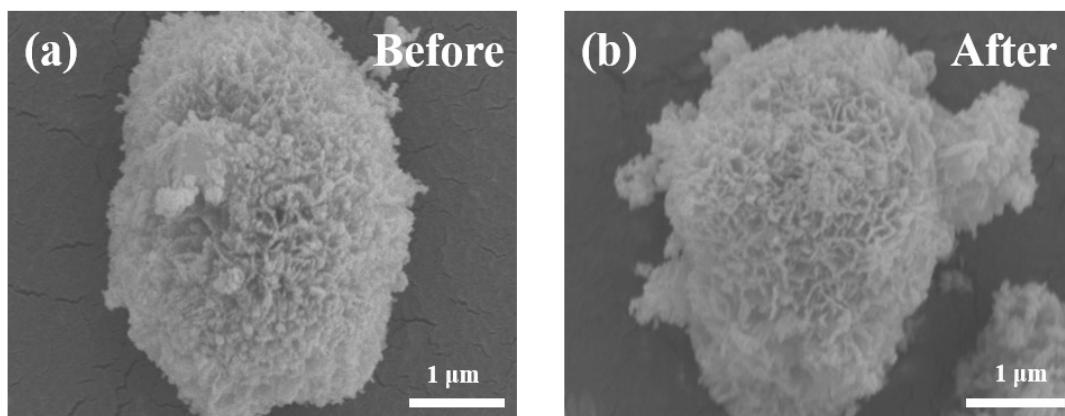

**Fig. S3** SEM images of the  $\text{In}_2\text{O}_3/\text{In}_2\text{S}_3-0.5\text{ZCS}$  sample before (a) and after (b) the photocatalytic cycling test.

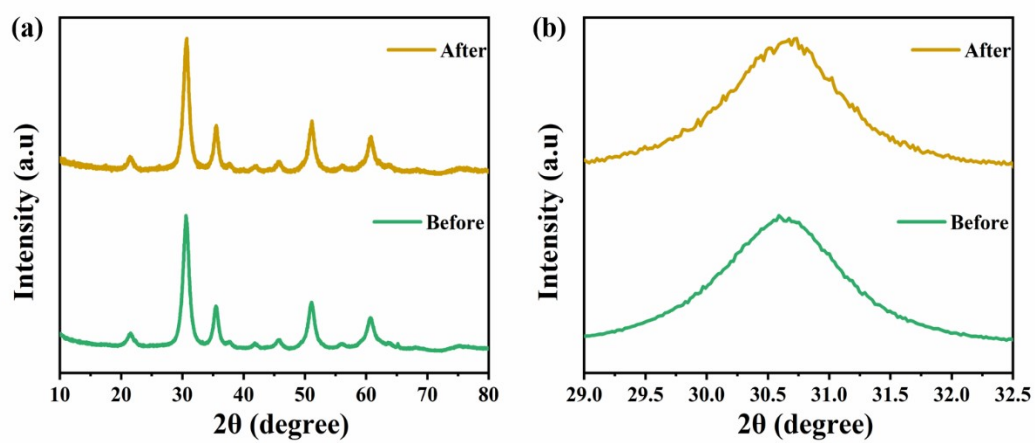

Fig. S4 XRD patterns of the  $\text{In}_2\text{O}_3/\text{In}_2\text{S}_3\text{-}0.5\text{ZCS}$  samples before and after the photocatalytic cycling test.
